# Supplementary material
Source: Springer Nature journal article supplement (https://www.springermedizin.de/resource/supplementary/13012_2012_621_MOESM1_ESM.pdf/9630328)
Supplement: MOESM1 [file 9630328]

| <b>Round 1: Survey containing 56 items.</b>                                                                               | In relation to CCC, does this item represent BHP behavior that is Essential, Compatible, or Prohibited? |            |            |
|---------------------------------------------------------------------------------------------------------------------------|---------------------------------------------------------------------------------------------------------|------------|------------|
|                                                                                                                           | Essential                                                                                               | Compatible | Prohibited |
| During a clinical encounter with a patient, I provide traditional psychotherapy and specialized behavioral interventions. |                                                                                                         |            |            |



| <b>Round 2: Survey containing 39 items that did not meet consensus after Round 1.</b>                                     |                                                  |                                         |                                                                            | Please indicate whether the Round 2 version represents BHP behavior that is: |            |            |
|---------------------------------------------------------------------------------------------------------------------------|--------------------------------------------------|-----------------------------------------|----------------------------------------------------------------------------|------------------------------------------------------------------------------|------------|------------|
| Round 1 version of item 44                                                                                                | Your rank for this item from Round 1             | Current level of consensus from Round 1 | Round 2 version of item 44                                                 | Essential                                                                    | Compatible | Prohibited |
| During a clinical encounter with a patient, I provide traditional psychotherapy and specialized behavioral interventions. | <i>&lt;Participant's response shown here&gt;</i> | 55% voted Prohibited                    | During a patient appointment, I provide on-going individual psychotherapy. |                                                                              |            |            |



| <b>Round 3: Survey containing 13 items that did not meet consensus after Round 2.</b> |                                                  |                                         |                                                                           | Please indicate whether the Round 3 version represents BHP behavior that is: |            |            |
|---------------------------------------------------------------------------------------|--------------------------------------------------|-----------------------------------------|---------------------------------------------------------------------------|------------------------------------------------------------------------------|------------|------------|
| Round 2 version of item 44                                                            | Your rank for this item from Round 2             | Current level of consensus from Round 2 | Round 3 version of item 44                                                | Essential                                                                    | Compatible | Prohibited |
| During a patient appointment, I provide on-going individual psychotherapy.            | <i>&lt;Participant's response shown here&gt;</i> | 72% voted Prohibited                    | I typically see patients for 10 or more appointments per episode of care. |                                                                              |            |            |
